# 1 **Untargeted metabolomics suffers from incomplete data analysis**

2 **Richard Baran**

3 Baran Bioscience, LLC; 2150 Allston Way Suite 400; Berkeley, California, USA.

4 E-mail: richard@baranbioscience.com

5 *Brief Communication*

## 6 **Abstract**

7 *Introduction:* Untargeted metabolomics is a powerful tool for biological discoveries. Significant  
8 advances in computational approaches to analyzing the complex raw data have been made, yet it is  
9 not clear how exhaustive and reliable are the data analysis results.

10 *Objectives:* Assessment of the quality of data analysis results in untargeted metabolomics.

11 *Methods:* Five published untargeted metabolomics studies acquired using instruments from  
12 different manufacturers were reanalyzed.

13 *Results:* Omissions of at least 50 relevant compounds from original results as well as examples of  
14 representative mistakes are reported for each study.

15 *Conclusion:* Incomplete data analysis shows unexplored potential of current and legacy data.

## 16 **Keywords**

17 metabolomics, mass spectrometry, data analysis, liquid chromatography

## 18 **Introduction**

19 Mass spectrometry-based metabolomics is a powerful tool for the discovery of novel compounds,  
 20 metabolic capabilities, and biomarkers (Patti et al. 2012; Sévin et al. 2015). Successful discoveries  
 21 are dependent on the ability to reliably detect relevant signals in raw data and to correctly interpret  
 22 the underlying spectral features of compounds (Kind & Fiehn 2007; Dunn et al. 2013; Scheubert et  
 23 al. 2013; Baran & Northen 2013; Kind et al. 2017). The challenging complexity of the data analysis  
 24 process is well recognized and computational tools facilitating the data analysis process are  
 25 available (Weber et al. 2017). However, it is not clear how exhaustive and reliable are the current  
 26 data analysis results. The quality of the results is important not only in the context of exploratory  
 27 research but even more so in the context of a strengthening trend towards large scale  
 28 integration of multi-omic datasets (Perez-Riverol et al. 2017). Public repositories of metabolomics  
 29 data, such as the UCSD Metabolomics Workbench (Sud et al. 2016) or the MetaboLights (Haug et  
 30 al. 2013) database, provide an opportunity to reanalyze published raw data to assess the coverage of  
 31 relevant signals as well as the quality of mass spectra interpretation.

32 Five untargeted metabolomics datasets from public repositories acquired using instruments from  
 33 different manufacturers were selected for reanalysis (Table 1, Supplementary Fig. 1-5). The  
 34 selection was arbitrary with a focus leaning towards high complexity of the raw data (large numbers  
 35 of detected compounds).

## 36 **Materials and Methods**

37 Raw datafiles along with accompanying data analysis results were downloaded from the  
 38 respective data repositories (Table 1). Raw data files in original instrument manufacturers'  
 39 proprietary data formats were converted to mzXML (Pedrioli et al. 2004) data format using  
 40 ProteoWizard's msconvert tool (Chambers et al. 2012). Differences among datasets within a specific  
 41 study (for ions not reported in original study results) were detected using direct comparisons  
 42 between datasets binned along the m/z dimension as described previously (Baran et al. 2006). The

mass spectra and extracted ion chromatograms corresponding to candidate differences were then inspected visually to assign related ions (e.g.  $[M+H]^+$ , adducts, multimers, in-source fragments, isotopic peaks). To limit the extent of tedious manual curation, the aim of the reanalysis was to find 50 relevant omissions in each study.

To be considered an omission, none of the ions corresponding to the omitted compound could be reported in the original results (even if the only reported ion corresponds to an isotopic peak of an in-source fragment ion of a specific compound). Only raw data acquired in positive mode polarity were used for re-analysis for each study. However, negative mode raw data and results were examined as well. If none of the ions of a specific compound were reported in positive mode results, but at least one ion related to the compound was reported in negative mode results, the compound was not considered and not reported as an omission.

Multiple ions for omitted compounds along with their peak areas are listed in Supplementary Data 1. These lists of ions are not exhaustive. Low intensity isotopic peaks or ions that could be potentially related (but not showing clear similarities in chromatographic profiles, relative peak areas across samples, or differences in  $m/z$  to other ions of typical chemical relationships) may have been left out of these lists. However, records for even these possibly related ions were sought in original results accompanying the study to make the best effort to report truly omitted compounds in reanalysis results.

Peak areas were calculated using the trapezoidal integration method without any prior smoothing of extracted ion chromatograms or baseline subtraction. Integration bounds were set manually. The ion with the largest peak area from a group of related ions was selected as a "representative" ion for a given compound and used for extracted ion chromatograms (Fig. 1, Supplementary Fig. 6-10). Few representative mistakes found during the reanalysis process were mostly related to ion type (mis)interpretation in the original results and are shown in Supplementary Figures 12-16. A rough comparison of relevance of omitted compounds to the original results was based on peak areas of

68 "representative" ions and a measure of a statistical significance of a difference among the groups of  
 69 replicate samples in a study, if applicable (Supplementary Fig. 11). Peak areas calculated by the  
 70 trapezoidal method were normalized to peak areas in the original results (Supplementary Fig. 17-  
 71 21) for this comparison.

## 72 **Results and Discussion**

73 The raw data were reanalyzed as described in the Materials and Methods section to look for  
 74 omissions of relevant compounds as well as examples of common mistakes in the original data  
 75 analysis results accompanying the study data. To limit the extent of tedious manual curation of the  
 76 data, a goal of finding 50 relevant omissions in each study was set. For a compound to be  
 77 considered omitted, none of its ions (e.g.  $[M+H]^+$ , adducts, multimers, in-source fragments, isotopic  
 78 peaks) could be reported in the original results. Figure 1a-d shows a few examples of omissions  
 79 from one of the reanalyzed studies, and Supplementary Figures 6-10 show examples of at least 50  
 80 omissions from each study. These omissions are relevant in the context of reported results, since  
 81 these compounds show either intense signals or differ significantly among the study groups  
 82 (Supplementary Fig. 11). In addition to omissions, mistakes in ion type interpretation were also  
 83 found during the reanalysis. The most commonly observed mistake was the reporting of in-source  
 84 fragment ions, isotopic peaks, or other ion types instead of the protonated molecule  $[M+H]^+$  ion  
 85 (Fig. 1e, Supplementary Fig 12-16).

86 This reanalysis of published metabolomics studies was far from exhaustive. The newly reported  
 87 lists of ions for omitted compounds (Supplementary Data 1) are incomplete, may contain mistakes  
 88 as well, and additional unreported compounds are very likely present in the raw data. The selected  
 89 metabolomics studies have impressive quality of the raw data as well as original data analysis  
 90 results which must have required significant effort and insight. And yet the results of this simple  
 91 reanalysis point to an additional unexplored potential of current as well as legacy metabolomics  
 92 data. Hopefully, these results will strengthen the appreciation for the complexities of the data

93 analysis process and further motivate improvements in computational tools and knowledgebases for  
94 metabolomics data analysis.

## 95 **Conflict of interest**

96 The author's company Baran Bioscience, LLC provides data analysis services for metabolomics  
97 and small molecule mass spectrometry.

## 98 **References**

- 99 Baran, R., & Northen, T. R. (2013). Robust automated mass spectra interpretation and chemical  
100 formula calculation using mixed integer linear programming. *Analytical chemistry*, 85(20), 9777-  
101 9784.
- 102 Baran, R., Kochi, H., Saito, N., Suematsu, M., Soga, T., Nishioka, T., et al. (2006). MathDAMP: a  
103 package for differential analysis of metabolite profiles. *BMC Bioinformatics*, 7, 530.
- 104 Chambers, M. C., Maclean, B., Burke, R., Amodei, D., Ruderman, D. L., Neumann, S., et al.  
105 (2012). A cross-platform toolkit for mass spectrometry and proteomics. *Nature Biotechnology*,  
106 30, 918-920.
- 107 Dunn, W. B., Erban, A., Weber, R. J., Creek, D. J., Brown, M., Breitling, R., et al. (2013). Mass  
108 appeal: metabolite identification in mass spectrometry-focused untargeted metabolomics.  
109 *Metabolomics*, 9, 44-66.
- 110 Haug, K., Salek, R. M., Conesa, P., Hastings, J., de Matos, P., Rijnbeek, M., et al. (2013).  
111 MetaboLights—an open-access general-purpose repository for metabolomics studies and  
112 associated meta-data. *Nucleic Acids Research*, 41, D781-D786.
- 113 Kind, T., & Fiehn, O. (2007). Seven Golden Rules for heuristic filtering of molecular formulas  
114 obtained by accurate mass spectrometry. *BMC Bioinformatics*, 8, 105.

115 Kind, T., Tsugawa, H., Cajka, T., Ma, Y., Lai, Z., Mehta, S. S., et al. (2017). Identification of small  
116 molecules using accurate mass MS/MS search. *Mass Spectrometry Reviews*.

117 Patti, G. J., Yanes, O., & Siuzdak, G. (2012). Innovation: Metabolomics: the apogee of the omics  
118 trilogy. *Nature Reviews Molecular Cell Biology*, 13, 263-269.

119 Pedrioli, P. G., Eng, J. K., Hubley, R., Vogelzang, M., Deutsch, E. W., Raught, B., et al. (2004). A  
120 common open representation of mass spectrometry data and its application to proteomics  
121 research. *Nature Biotechnology*, 22, 1459-1466.

122 Perez-Riverol, Y., Bai, M., da Veiga Leprevost, F., Squizzato, S., Park, Y. M., Haug, K., et al.  
123 (2017). Discovering and linking public omics data sets using the Omics Discovery Index. *Nature*  
124 *Biotechnology*, 35(5), 406-409.

125 Scheubert, K., Hufsky, F., & Böcker, S. (2013). Computational mass spectrometry for small  
126 molecules. *Journal of Cheminformatics*, 5, 12.

127 Sévin, D. C., Kuehne, A., Zamboni, N., & Sauer, U. (2015). Biological insights through nontargeted  
128 metabolomics. *Current Opinion in Biotechnology*, 34, 1-8.

129 Sud, M., Fahy, E., Cotter, D., Azam, K., Vadivelu, I., Burant, C., et al. (2016). Metabolomics  
130 Workbench: An international repository for metabolomics data and metadata, metabolite  
131 standards, protocols, tutorials and training, and analysis tools. *Nucleic Acids Research*, 44(D1),  
132 D463-D470.

133 Weber, R. J., Lawson, T. N., Salek, R. M., Ebbels, T. M., Glen, R. C., Goodacre, R., et al. (2017).  
134 Computational tools and workflows in metabolomics: An international survey highlights the  
135 opportunity for harmonisation through Galaxy. *Metabolomics*, 13(2), 12.

## 136 Tables

### 137 Table 1 - Untargeted metabolomics studies selected for reanalysis

| Study Identifier               | ST000403                                                                                                                                                                                            | ST000326                                                                                                                                                                                            | ST000220                                                                                                                                                                                            | MTBLS214                                                                                            | ST000259                                                                                                                                                                                            |
|--------------------------------|-----------------------------------------------------------------------------------------------------------------------------------------------------------------------------------------------------|-----------------------------------------------------------------------------------------------------------------------------------------------------------------------------------------------------|-----------------------------------------------------------------------------------------------------------------------------------------------------------------------------------------------------|-----------------------------------------------------------------------------------------------------|-----------------------------------------------------------------------------------------------------------------------------------------------------------------------------------------------------|
| <b>Instrument</b>              | Thermo Scientific Q-Exactive Orbitrap                                                                                                                                                               | Agilent 6530 QTOF                                                                                                                                                                                   | Waters Synapt-G2 Si                                                                                                                                                                                 | AB Sciex TripleTOF 5600                                                                             | Bruker MicrOTOF II                                                                                                                                                                                  |
| <b>Sample Layout</b>           | 6 groups of 3 replicates <sup>a</sup>                                                                                                                                                               | 19 individual samples                                                                                                                                                                               | 3 groups of 7 replicates                                                                                                                                                                            | 3 groups of 4-5 replicates                                                                          | 14 groups of 5-6 replicates                                                                                                                                                                         |
| <b>Compounds /features (+)</b> | 590                                                                                                                                                                                                 | 962                                                                                                                                                                                                 | 1259                                                                                                                                                                                                | 18                                                                                                  | 857                                                                                                                                                                                                 |
| <b>50+ Omissions</b>           | +                                                                                                                                                                                                   | +                                                                                                                                                                                                   | +                                                                                                                                                                                                   | +                                                                                                   | +                                                                                                                                                                                                   |
| <b>Mistakes</b>                | +                                                                                                                                                                                                   | +                                                                                                                                                                                                   | +                                                                                                                                                                                                   | +                                                                                                   | +                                                                                                                                                                                                   |
| <b>Study URL</b>               | <a href="http://www.metabolomicsworkbench.org/data/DRCCMetadata.php?Mode=Study&amp;StudyID=ST000403">http://www.metabolomicsworkbench.org/data/DRCCMetadata.php?Mode=Study&amp;StudyID=ST000403</a> | <a href="http://www.metabolomicsworkbench.org/data/DRCCMetadata.php?Mode=Study&amp;StudyID=ST000326">http://www.metabolomicsworkbench.org/data/DRCCMetadata.php?Mode=Study&amp;StudyID=ST000326</a> | <a href="http://www.metabolomicsworkbench.org/data/DRCCMetadata.php?Mode=Study&amp;StudyID=ST000220">http://www.metabolomicsworkbench.org/data/DRCCMetadata.php?Mode=Study&amp;StudyID=ST000220</a> | <a href="http://www.ebi.ac.uk/metabolights/MTBLS214">http://www.ebi.ac.uk/metabolights/MTBLS214</a> | <a href="http://www.metabolomicsworkbench.org/data/DRCCMetadata.php?Mode=Study&amp;StudyID=ST000259">http://www.metabolomicsworkbench.org/data/DRCCMetadata.php?Mode=Study&amp;StudyID=ST000259</a> |

<sup>a</sup>Four of the six groups contained added stable isotope labels. Peaks corresponding to clear stable isotope labeling signals or peaks absent from the two control groups without stable isotope labeling were not considered as possible compound omissions.

## 141 Figure Legends

### 142 Figure 1 - Examples of omissions and mistakes in results from study ST000403. (a)

143 Visualization of a part of one of the raw datafiles. Gray labels correspond to annotations from  
 144 original results accompanying the study data. Magenta labels correspond to omissions or mistakes.  
 145 **(b-d)** Mass spectra and extracted ion chromatograms for examples of omissions. **(e)** A mass  
 146 spectrum and extracted ion chromatograms for examples of mistakes. An in-source fragment ion  
 147 and an isotopic peak of a multimer of HEPES were incorrectly identified as different compounds.  
 148 Peaks of related ions for a given compound in plots of mass spectra are highlighted in magenta.  
 149 Color coding for groups of replicate samples in extracted ion chromatograms is the same as in  
 150 Supplementary Figure 6.

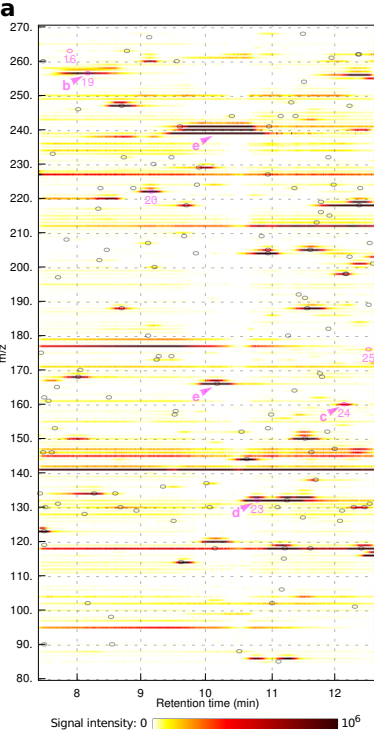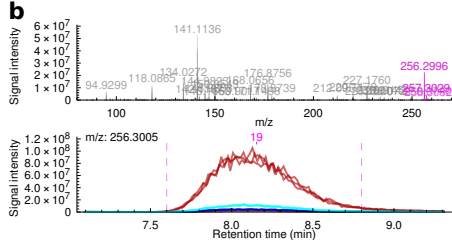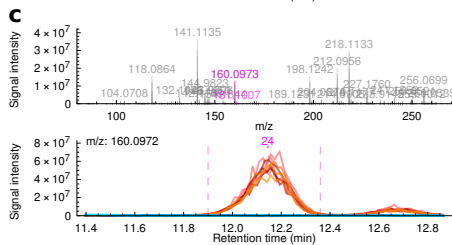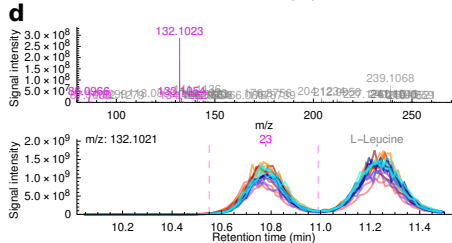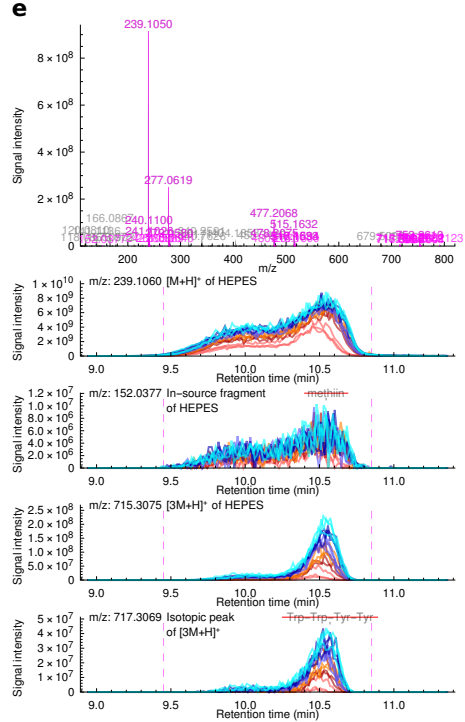

Source: https://www.biorxiv.org/content/10.1101/143818v1.full.pdf
